# Supplementary material
Source: PubMed Central journal article supplement (PMC3494204)
Supplement: supp_M112.017194_mcp.M112.017194-1.pdf [file supp_M112.017194_mcp.M112.017194-1.pdf]

**Supplementary Table 1. Oligonucleotides used in this study**

| Name                | Sequence (5'-3')        |
|---------------------|-------------------------|
| <b>QPCR</b>         |                         |
| Rnh1_Fwd            | TCCAGTGTGAGCAGCTGAG     |
| Rnh1_Rev            | TGCAGGCACTGACTGAAGCACCA |
| Senp3_Fwd           | GAGAGGGTCTCCACCAGTGCC   |
| Senp3_Rev           | CTGCGCTCCCCTTCAGGACCA   |
| Wdr18_Fwd           | CTGGCCTGGAGCCTCTGCAGT   |
| Wdr18_Rev           | CCAATGAAGCGGTGGCCACCC   |
| Las1L_Fwd           | CGAGTGCCAGGGGTATCGTCCG  |
| Las1L_Rev           | GCCAGGGGCAGTTCGTTGCCT   |
| Tex10_Fwd           | GCTGCTTGAGTCTCTTGGAGG   |
| Tex10_Rev           | GCCAGCCAACGGGAGAGCACT   |
| Pelp1_Fwd           | GCTGGGCCTCAGACCAGAGTG   |
| Pelp1_Rev           | CTCGCAGGCCAGCTGTTGGAG   |
| Dusp6_Fwd           | GCGAGTTCAAATACAAGCAA    |
| Dusp6_Rev           | ACCAGGACACCACAGTTTTTG   |
| Tubb1_Fwd           | TAAGAAGTATGTGCCGCGAG    |
| Tubb1_Rev           | AGTTGTTACCAGCACAGAGTTA  |
| Zbp89_Fwd           | CATGAGGAGACAGTGAAAAATG  |
| Zbp89_Rev           | CTGTAAGTCTACTGGCTCTCTG  |
| Atf5_Fwd            | CTGGCTCGTAGACTATGGGAA   |
| Atf5_Rev            | TCCAATCAGAGAAGCCGTCA    |
| <b>ChIP</b>         |                         |
| Amylase_Fwd         | CTCCTTGTACGGGTTGGT      |
| Amylase_Rev         | AATGATGTGCACAGCTGAA     |
| Dusp6_Fwd           | ACACACGATCTAAAGGAGGAC   |
| Dusp6_Rev           | CAATTAGCAAGCACAAAAGC    |
| Tubb1_Fwd           | GGATGTACAAGTGTCTCTGAGC  |
| Tubb1_Rev           | TATCTTTCCGCTCATTTC      |
| Zbp-89_Fwd          | CTGGGAGGAGGAAGAGAAG     |
| Zbp-89_Rev          | GAGAGAACTTTTGCTGTGGC    |
| Atf5_Fwd            | GGTTCCTCACTTCGTCTCC     |
| Atf5_Rev            | TTCACTCTCCGCTCACACC     |
| Osm_Fwd             | CTGGGGAGACTTTGGTTTT     |
| Osm_Rev             | ACTGGGTCCTGGTACTCTGG    |
| Gata-1 Upstream_Fwd | TGATGGCTTCTACTAGGCACACG |
| Gata-1 Upstream_Rev | GGCTTCACTCCCAGGAATGTAGG |

## Supplemental Figure 1, Fanis et al.

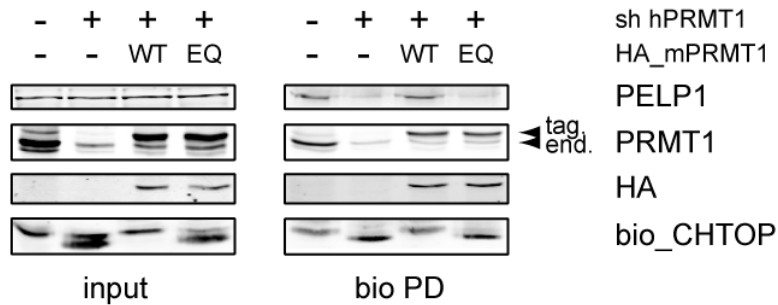

### Supplemental Figure 1. Methylation of Chtop is required for Pelp1 recruitment

293T cells were depleted for endogenous PRMT1 using an shRNA against PRMT1 (sh hPRMT1). PRMT1 depleted cells were transiently transfected with expression vectors encoding mouse wild type (WT) and enzymatic inactive (EQ) Prmt1 (HA\_mPRMT1). Cell lysates were analyzed by streptavidin pull-down (bio PD) and Western blotting with the antibodies indicated. Arrows indicate endogenous (end.) and HA-tagged (tag.) Prmt1.

## Supplemental Figure 2, Fanis et al.

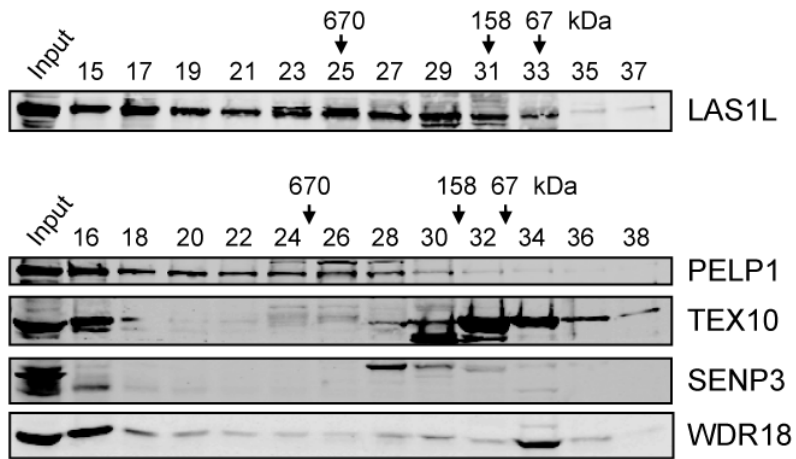

### Supplemental Figure 2. 5FMC elution patterns in 293T cells

293T cell nuclear extracts were analyzed by sized-exclusion chromatography on a Superose 6 column. Proteins eluted from the indicated fractions were blotted with the indicated antibodies. Molecular mass markers are indicated at the top.

# Supplemental Figure 3, Fanis et al.

A

| Strept. PD of Bio_HA_Pelp1 |             |              |
|----------------------------|-------------|--------------|
| Protein                    | uniq. pept. | coverage (%) |
| Las1L                      | 19          | 26.3         |
| Wdr18                      | 14          | 39.7         |
| Tex10                      | 16          | 19.2         |
| Pelp1                      | 11          | 11.4         |
| Senp3                      | 8           | 16.9         |
| Nol9                       | 4           | 6.4          |

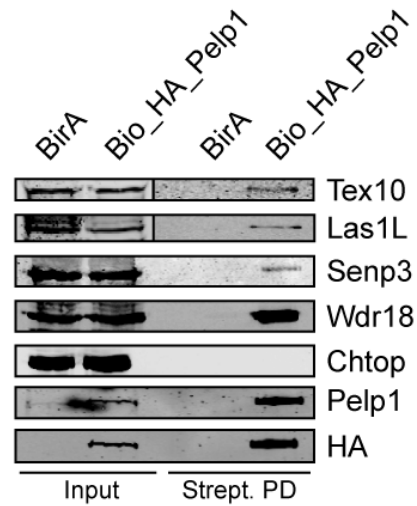

B

| Strept. PD of Bio_HA_Wdr18 |             |              |
|----------------------------|-------------|--------------|
| Protein                    | uniq. pept. | coverage (%) |
| Las1L                      | 20          | 31.3         |
| Wdr18                      | 15          | 41.3         |
| Tex10                      | 16          | 21           |
| Pelp1                      | 15          | 18.1         |
| Senp3                      | 15          | 30.1         |
| Nol9                       | 9           | 10.9         |

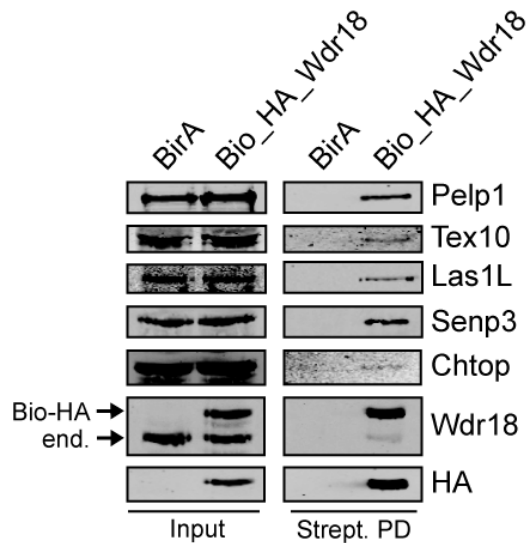

C

| Strept. PD of Bio_HA_Las1L |             |              |
|----------------------------|-------------|--------------|
| Protein                    | uniq. pept. | coverage (%) |
| Pelp1                      | 9           | 9.7          |
| Wdr18                      | 9           | 23           |
| Tex10                      | 4           | 4.5          |
| Las1L                      | 4           | 5.9          |
| Senp3                      | 4           | 7.9          |

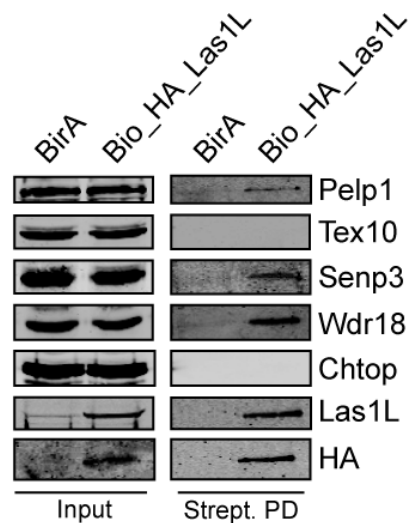

### **Supplemental Figure 3. 5FMC nuclear interactions**

(A) Pelp1 interactions in MEL cells. Whole cell lysates (Input) and streptavidin pull downs (Strept. PD) from MEL\_BirA (BirA) and MEL\_BirA cells expressing biotinylated Pelp1 (Bio\_HA\_Pelp1) were analyzed by MS (table) and western blotting. Immunoblot probed with the antibodies indicated.

(B) Wdr18 interactions in MEL cells. Whole cell lysates (Input) and streptavidin pull downs (Strept. PD) from MEL\_BirA (BirA) and MEL\_BirA cells expressing biotinylated Wdr18 (Bio\_HA\_Wdr18) were analyzed by MS (table) and western blotting. Immunoblot probed with the antibodies indicated. Arrows indicate endogenous (end.) and biotinylated (Bio\_HA) Wdr18.

(C) Las1L interactions in MEL cells. Whole cell lysates (Input) and streptavidin pull downs (Strept. PD) from MEL\_BirA (BirA) and MEL\_BirA cells expressing biotinylated Las1L (Bio\_HA\_Las1L) were analyzed by MS (table) and western blotting. Immunoblot probed with the antibodies indicated.

## Supplemental Figure 4, Fanis et al.

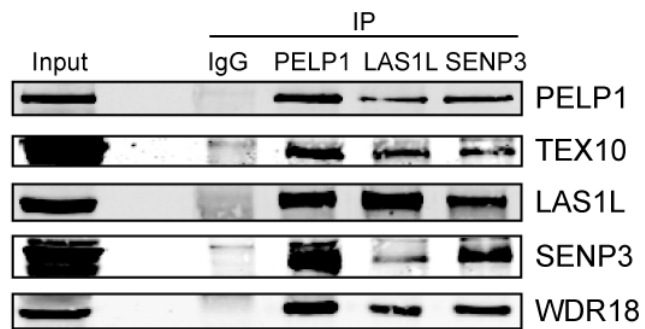

### Supplemental Figure 4. 5FMC is a nuclear complex

Endogenous association between the 5FMC components. 293T cell nuclear lysates were analyzed by immunoprecipitation (IP) and western blotting with the antibodies indicated.

Supplemental Figure 5, Fanis et al.

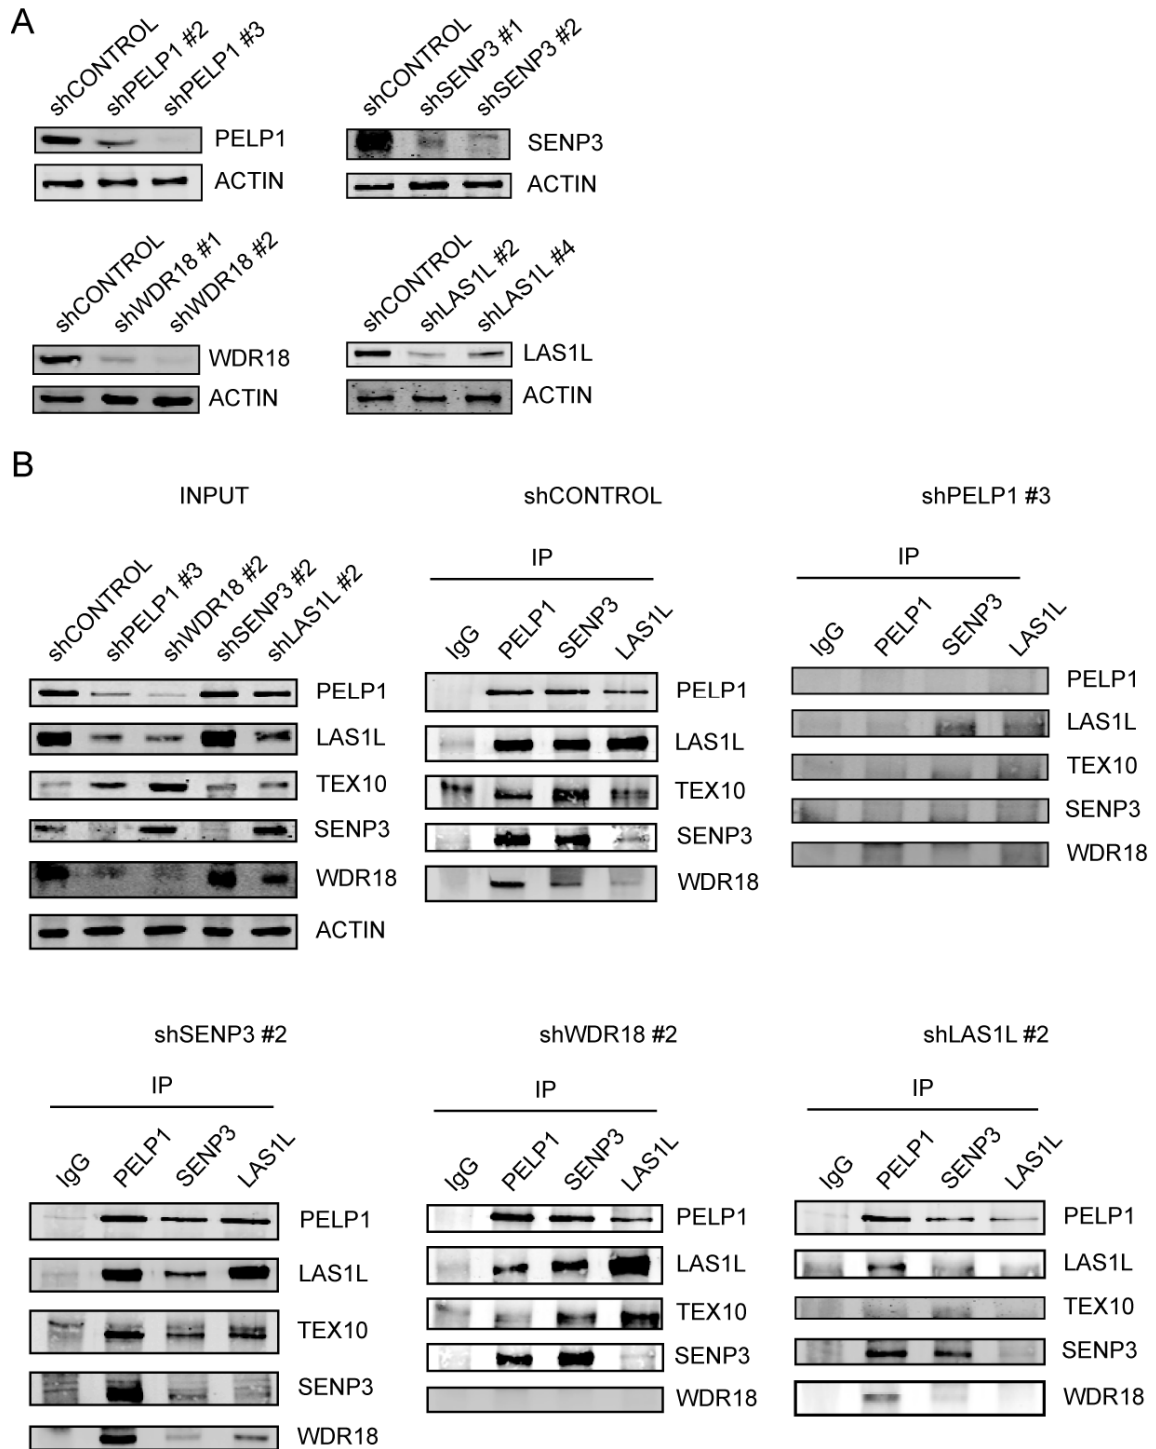

**Supplemental Figure 5. PELP1 is the key stabilizing component of 5FMC complex**

(A-B) 293T cells were transfected with the indicated shRNAs; whole cell lysates were analyzed by Western blotting using the indicated antibodies. Actin served as a loading control.

(B) Whole cell lysates (Input) and immunoprecipitations (IP) from 293T cells were analyzed by Western blotting to study the stability and interactions of 5FMC components after depletion of individual 5FMC members. Immunoblots were probed with the indicated antibodies; actin serves as a loading control. Immunoprecipitation results are shown only for the indicated shRNA. Similar results were obtained using the second shRNA construct.



# Supplemental Figure 6, Fanis et al.

## A

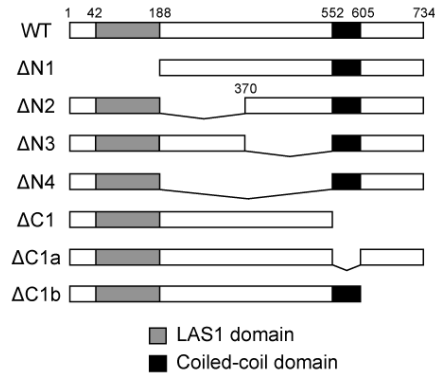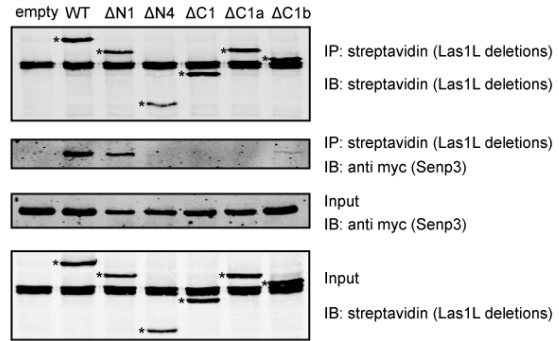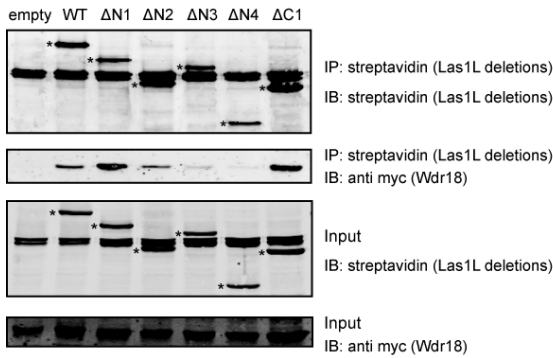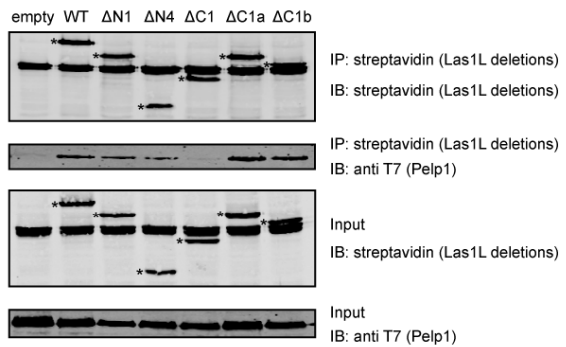

## B

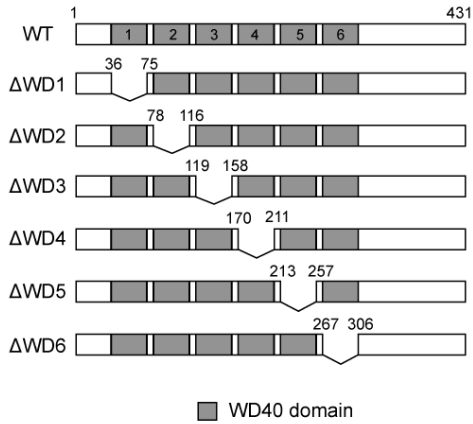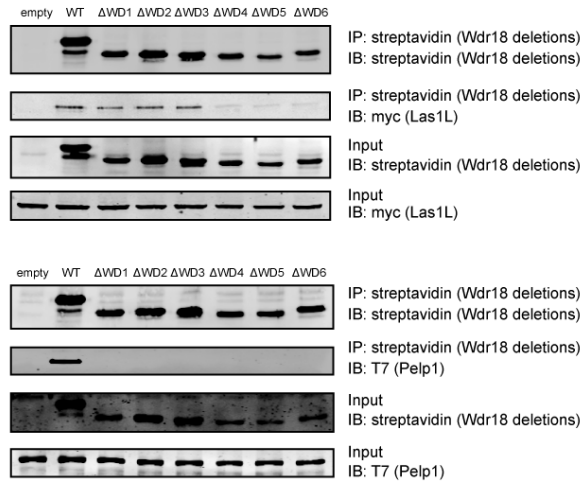

### **Supplemental Figure 6. Mapping the interaction regions of Las1L and Wdr18**

(A) Bio\_HA-tagged wild-type Las1L and its deletion mutants were expressed in 293T cells. Cell lysates were immunoprecipitated (IP) and blotted (IB) with the indicated antibodies. Whole cell lysates (Input) were blotted and ectopically expressed wild-type Wdr18 and its deletion mutants were visualized using a streptavidin antibody. Asterisks indicate wild-type Las1L and its deletion mutants.

(B) Bio\_HA-tagged wild-type Wdr18 and its deletion mutants were expressed in 293T cells. Cell lysates were immunoprecipitated (IP) and blotted (IB) with the antibodies indicated. Whole cell lysates (Input) were blotted and ectopically expressed wild-type Wdr18 and its deletion mutants were visualized using a streptavidin antibody.

## Supplemental Figure 7, Fanis et al.

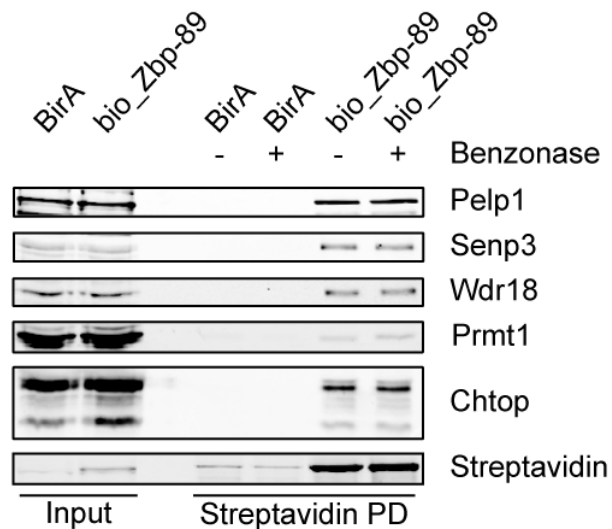

### Supplemental Figure 7. Chtop, Prmt1 and 5FMC complex are associated with Zbp-89

Streptavidin pull downs (Streptavidin PD) from MEL\_BirA (BirA) and MEL\_BirA cells expressing biotinylated Zbp-89 (Bio\_Zbp-89) were treated with Benzoylserine. Whole cell lysates (Input) and streptavidin pull downs were analyzed by western blotting. Immunoblot probed with the antibodies indicated.

# Supplemental Figure 8, Fanis et al.

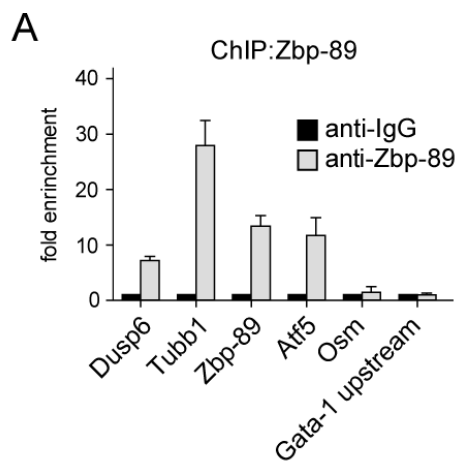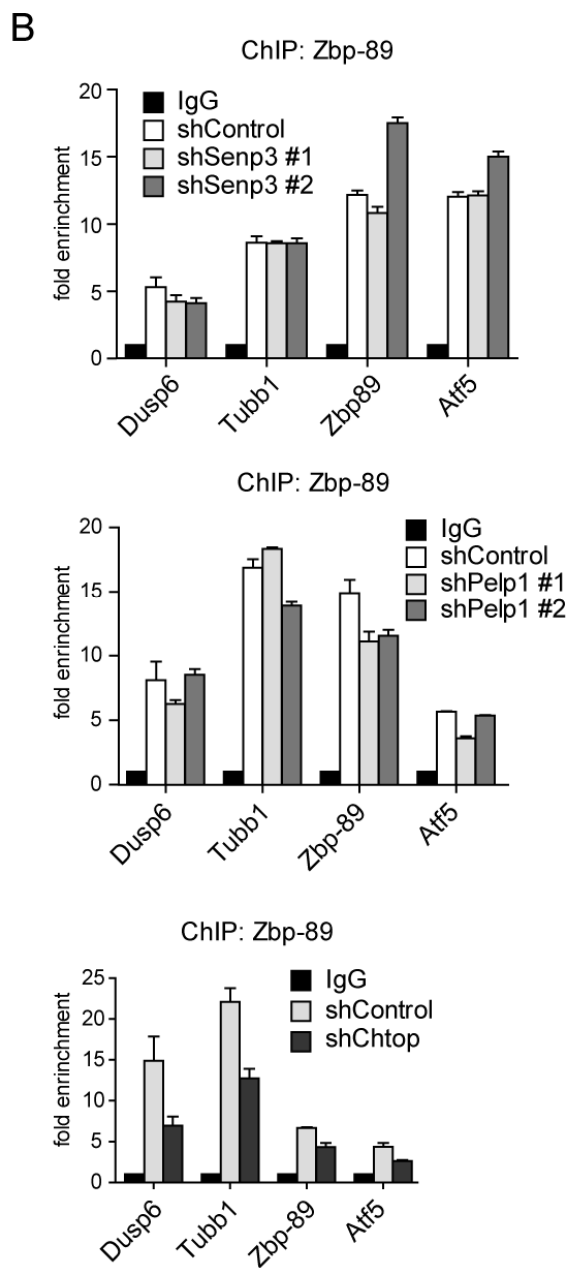

**Supplemental Figure 8. Recruitment of Zbp-89 to its target genes does not depend on 5FMC**

(A) Zbp-89 is recruited to the promoter regions of *Dusp6*, *Zbp-89*, *Atf5* and the coding region of *Tubb1*. MEL\_BirA cells analysed by ChIP using Zbp89 antibody for the indicated gene promoter or coding regions. The promoter region of the *Osm* gene and the region upstream of *Gata-1* promoter (*Gata-1* upstream) were used as negative controls.

(B) Pelp1, Senp3 and Chtop knockdowns do not affect Zbp-89 binding at the promoter or coding regions of *Dusp6*, *Tubb1*, *Zbp-89* and *Atf5*. MEL\_BirA cells were treated as in (Fig. 6B). ChIP analysis at the indicated regions was performed using Zbp-89 antibody. Error bars: SD of triplicate experiment.
